# Supplementary material for: A high-loading catalyst of highly dispersed nickel species on acid-treated mesoporous clay layers for efficient CO and CO2 methanation
Source: Royal Society of Chemistry journal article supplement (doi:10.1039/d4se01179a), 2024-01-01
Supplement: d4se01179a1.pdf [file d4se01179a1.pdf]

## Supporting Information

# **A High Loaded Catalyst of Highly Dispersed Nickel Species on Acid-Treated Mesoporous Clay Layers for Efficient CO and CO<sub>2</sub> Methanation**

Feifei Li <sup>a</sup>, Junbo Zhang <sup>a</sup>, Yufu Liu <sup>a</sup>, Guanjun Gao <sup>a</sup>, Yi He <sup>a</sup>, and Xuzhuang Yang <sup>a</sup>,

<sup>b\*</sup>

<sup>a</sup> College of Chemistry and Chemical Engineering, Inner Mongolia University, Hohhot 010021, China

<sup>b</sup> Inner Mongolia Key Lab of Rare Earth Materials Chemistry and Physics, Inner Mongolia University, Hohhot, Inner Mongolia, 010021, P. R. China;

\*Corresponding author: Xuzhuang Yang

E-mail address: [xzyang@imu.edu.cn](mailto:xzyang@imu.edu.cn)

---

## 1. Orthogonal experimental design.

To screen catalysts, we investigated the effects of four factors: (1) two types of clays, raw montmorillonite (A0) and acid-modified montmorillonite (A1); (2) four nickel loadings of 5% (B5), 10% (B10), 15% (B15), and 20% (B20); (3) four types of amino acids, L-lysine (C1), L-alanine (C2), L-serine (C3), and glycine (C4); and (4) four amino acid to nickel molar ratios of 0 (D0), 1 (D1), 2 (D2), and 3 (D3). Table S1 illustrates the orthogonal experimental scheme created by the statistical program Statistical Product and Service Solutions (SPSS).

**Table S1** Orthogonal experimental scheme

| Catalysts | Clays | Ni loadings | Amino acids | Molar ratio |
|-----------|-------|-------------|-------------|-------------|
| 1         | A0    | B10         | C1          | D1          |
| 2         | A1    | B20         | C1          | D3          |
| 3         | A1    | B15         | C1          | D2          |
| 4         | A0    | B5          | C3          | D3          |
| 5         | A0    | B20         | C2          | D1          |
| 6         | A1    | B10         | C4          | D0          |
| 7         | A0    | B15         | C4          | D3          |
| 8         | A0    | B15         | C2          | D0          |
| 9         | A0    | B10         | C3          | D2          |
| 10        | A0    | B20         | C4          | D2          |
| 11        | A1    | B20         | C3          | D0          |
| 12        | A0    | B5          | C1          | D0          |
| 13        | A1    | B15         | C3          | D1          |
| 14        | A1    | B5          | C4          | D1          |
| 15        | A1    | B10         | C2          | D3          |
| 16        | A1    | B5          | C2          | D2          |

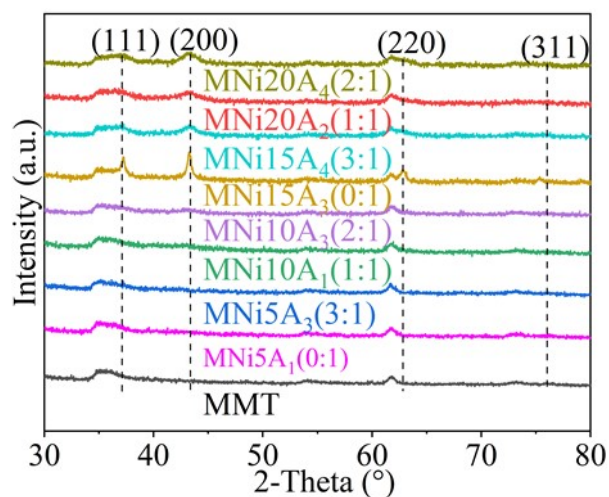

**Fig. S1.** XRD patterns of nickel catalysts supported on the M (MNiA<sub>b</sub>(D))

**Table S2** The amount of Ni in the catalyst and the size of NiO particles

| Catalyst                  | Ni loading (wt.%) | NiO particle size (nm) |
|---------------------------|-------------------|------------------------|
| MNi5A <sub>1</sub> (0:1)  | 5                 | -                      |
| MNi5A <sub>3</sub> (3:1)  | 5                 | -                      |
| MNi10A <sub>1</sub> (1:1) | 10                | -                      |
| MNi10A <sub>3</sub> (2:1) | 10                | -                      |
| MNi15A <sub>3</sub> (0:1) | 15                | 56.32                  |
| MNi15A <sub>4</sub> (3:1) | 15                | 13.36                  |
| MNi20A <sub>2</sub> (1:1) | 20                | 9.28                   |
| MNi20A <sub>4</sub> (2:1) | 20                | 15.94                  |

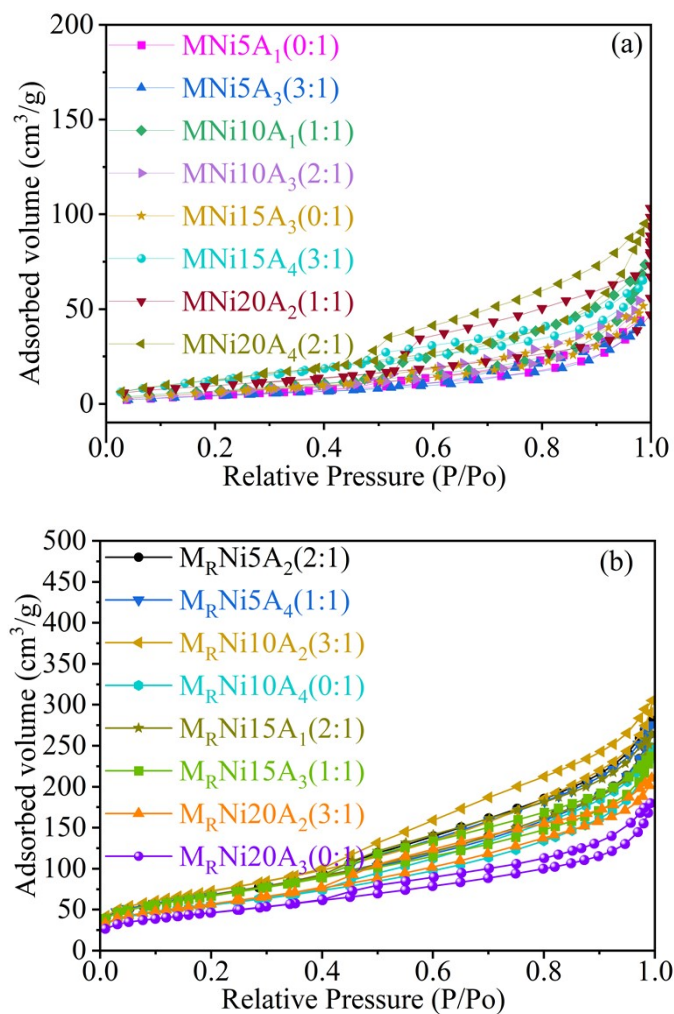

**Fig. S2.**  $N_2$  adsorption-desorption isotherms and pore size distribution curves of (a, b) the catalysts designed for orthogonal experiment

---

## 2.Catalyst activity

**Table S3** Orthogonal experiment CO conversion, CH<sub>4</sub> selectivity, and formation rate for the CO methanation

| Catalysts | Factor |    |   |   | CO Conv. (%) | S <sub>CH<sub>4</sub></sub> (%) | Formation rate (%) |
|-----------|--------|----|---|---|--------------|---------------------------------|--------------------|
|           | A      | B  | C | D |              |                                 |                    |
| 1         | 0      | 10 | 1 | 1 | 98.8         | 75.3                            | 74.2               |
| 2         | 1      | 20 | 1 | 3 | 99.5         | 78.7                            | 78.2               |
| 3         | 1      | 15 | 1 | 2 | 99.7         | 79.7                            | 79.3               |
| 4         | 0      | 5  | 3 | 3 | 83.0         | 76.8                            | 51.2               |
| 5         | 0      | 20 | 2 | 1 | 99.7         | 81.2                            | 80.9               |
| 6         | 1      | 10 | 4 | 0 | 98.4         | 72.4                            | 69.9               |
| 7         | 0      | 15 | 4 | 3 | 99.5         | 77.7                            | 77.2               |
| 8         | 0      | 15 | 2 | 0 | 98.5         | 73.9                            | 72.8               |
| 9         | 0      | 10 | 3 | 2 | 99.0         | 75.7                            | 74.9               |
| 10        | 0      | 20 | 4 | 2 | 99.7         | 81.0                            | 80.8               |
| 11        | 1      | 20 | 3 | 0 | 98.9         | 76.4                            | 75.6               |
| 12        | 0      | 5  | 1 | 0 | 71.5         | 62.8                            | 44.8               |
| 13        | 1      | 15 | 3 | 1 | 99.5         | 79.4                            | 79.0               |
| 14        | 1      | 5  | 4 | 1 | 94.5         | 69.0                            | 64.9               |
| 15        | 1      | 10 | 2 | 3 | 98.5         | 73.4                            | 71.9               |
| 16        | 1      | 5  | 2 | 2 | 92.6         | 67.7                            | 62.7               |

---

**Table S4** CO conversion range analysis data for the CO methanation

| Value name | A    | B       | C    | D    |
|------------|------|---------|------|------|
| K1         | 93.7 | 85.4    | 92.2 | 91.8 |
| K2         | 97.6 | 98.7    | 97.3 | 98.1 |
| K3         |      | 99.3    | 95.1 | 97.8 |
| K4         |      | 99.2    | 91.8 | 94.9 |
| Rj         | 3.9  | 13.9    | 5.9  | 6.3  |
| Importance |      | B>D>C>A |      |      |

**Table S5** CH<sub>4</sub> Selectivity range analysis data for the CO methanation

| Value name | A    | B       | C    | D    |
|------------|------|---------|------|------|
| K1         | 73.9 | 65.9    | 74.1 | 71.4 |
| K2         | 74.6 | 74.2    | 74.0 | 76.2 |
| K3         |      | 77.7    | 73.9 | 76.0 |
| K4         |      | 79.3    | 75.0 | 73.5 |
| Rj         | 0.6  | 13.5    | 0.9  | 4.9  |
| Importance |      | B>D>C>A |      |      |

**Table S6** CH<sub>4</sub> Formation Rate range analysis data for the CO methanation

| Value name | A    | B       | C    | D    |
|------------|------|---------|------|------|
| K1         | 69.6 | 55.9    | 69.1 | 65.7 |
| K2         | 72.7 | 72.7    | 72.1 | 74.8 |
| K3         |      | 77.0    | 70.2 | 74.4 |
| K4         |      | 78.9    | 73.2 | 69.6 |
| Rj         | 3.1  | 22.9    | 4.1  | 9.0  |
| Importance |      | B>D>C>A |      |      |

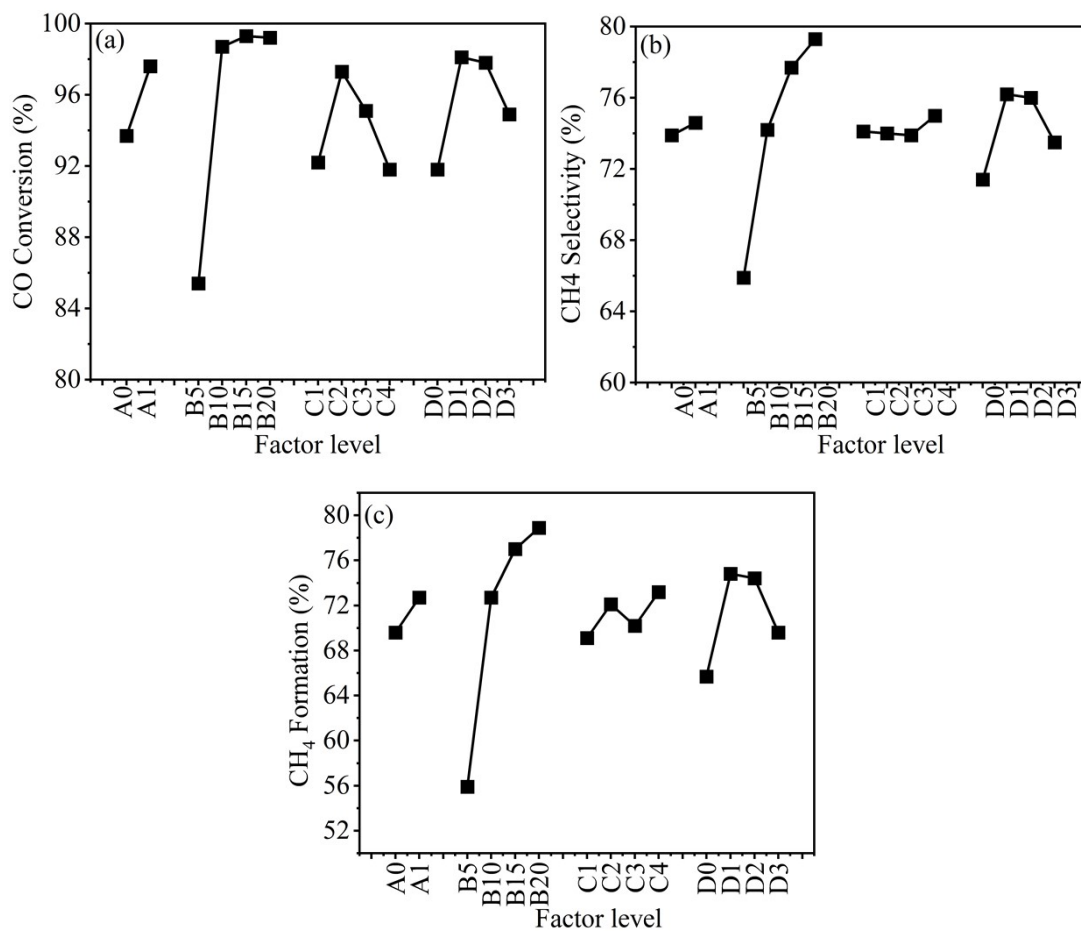

**Fig. S3.** Factor level diagram for the CO methanation.

**Table S7** Orthogonal experiment CO<sub>2</sub> conversion, CH<sub>4</sub> selectivity, and formation rate for the CO<sub>2</sub> methanation

| Catalysts | Factor |    |   |   | CO <sub>2</sub> Conv. (%) | S <sub>CH4</sub> (%) | Formation rate (%) |
|-----------|--------|----|---|---|---------------------------|----------------------|--------------------|
|           | A      | B  | C | D |                           |                      |                    |
| 1         | 0      | 10 | 1 | 1 | 82.1                      | 99.1                 | 81.2               |
| 2         | 1      | 20 | 1 | 3 | 88.4                      | 99.5                 | 87.9               |
| 3         | 1      | 15 | 1 | 2 | 88.0                      | 99.6                 | 87.6               |
| 4         | 0      | 5  | 3 | 3 | 64.3                      | 93.8                 | 60.3               |
| 5         | 0      | 20 | 2 | 1 | 89.5                      | 99.6                 | 89.1               |
| 6         | 1      | 10 | 4 | 0 | 76.0                      | 97.0                 | 72.9               |
| 7         | 0      | 15 | 4 | 3 | 84.0                      | 99.3                 | 83.2               |
| 8         | 0      | 15 | 2 | 0 | 77.0                      | 98.5                 | 75.5               |
| 9         | 0      | 10 | 3 | 2 | 78.0                      | 98.3                 | 76.4               |
| 10        | 0      | 20 | 4 | 2 | 88.4                      | 99.6                 | 88.1               |
| 11        | 1      | 20 | 3 | 0 | 83.8                      | 99.3                 | 82.9               |
| 12        | 0      | 5  | 1 | 0 | 60.4                      | 90.8                 | 54.8               |
| 13        | 1      | 15 | 3 | 1 | 88.0                      | 99.5                 | 87.1               |
| 14        | 1      | 5  | 4 | 1 | 66.0                      | 94.0                 | 62.0               |
| 15        | 1      | 10 | 2 | 3 | 80.8                      | 98.9                 | 79.6               |
| 16        | 1      | 5  | 2 | 2 | 72.5                      | 95.9                 | 69.1               |

**Table S8** CO<sub>2</sub> conversion range analysis data for the CO<sub>2</sub> methanation

| Value name | A    | B       | C    | D    |
|------------|------|---------|------|------|
| K1         | 77.9 | 67.1    | 79.8 | 77.3 |
| K2         | 81.1 | 79.2    | 79.9 | 82.7 |
| K3         |      | 84.3    | 78.5 | 81.7 |
| K4         |      | 87.5    | 79.9 | 79.4 |
| Rj         | 3.1  | 20.5    | 1.4  | 5.3  |
| Importance |      | B>D>A>C |      |      |

**Table S9** CH<sub>4</sub> Selectivity range analysis data for the CO<sub>2</sub> methanation

| Value name | A    | B       | C    | D    |
|------------|------|---------|------|------|
| K1         | 97.4 | 93.6    | 97.2 | 96.4 |
| K2         | 97.9 | 98.3    | 98.2 | 98.1 |
| K3         |      | 99.2    | 97.7 | 98.3 |
| K4         |      | 99.5    | 97.5 | 97.9 |
| Rj         | 0.6  | 5.9     | 0.9  | 1.9  |
| Importance |      | B>D>C>A |      |      |



**Table S10** CH<sub>4</sub> Formation Rate range analysis data for the CO<sub>2</sub> methanation

| Value name | A       | B    | C    | D    |
|------------|---------|------|------|------|
| K1         | 76.1    | 61.6 | 77.9 | 71.5 |
| K2         | 78.7    | 77.5 | 78.3 | 81.0 |
| K3         |         | 83.3 | 76.7 | 80.3 |
| K4         |         | 87.0 | 76.6 | 77.7 |
| Rj         | 2.6     | 25.4 | 1.8  | 9.5  |
| Importance | B>D>A>C |      |      |      |

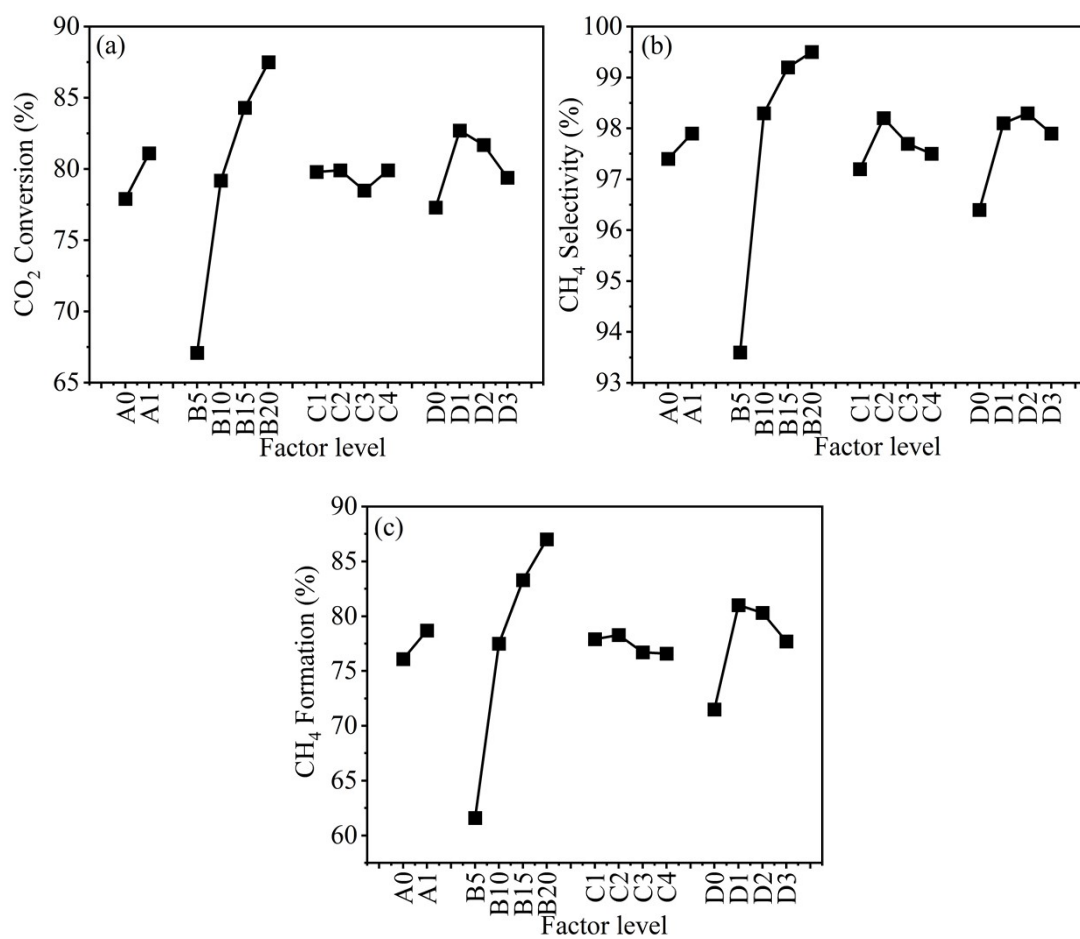

**Fig. S4.** Factor level diagram for the CO<sub>2</sub> methanation.

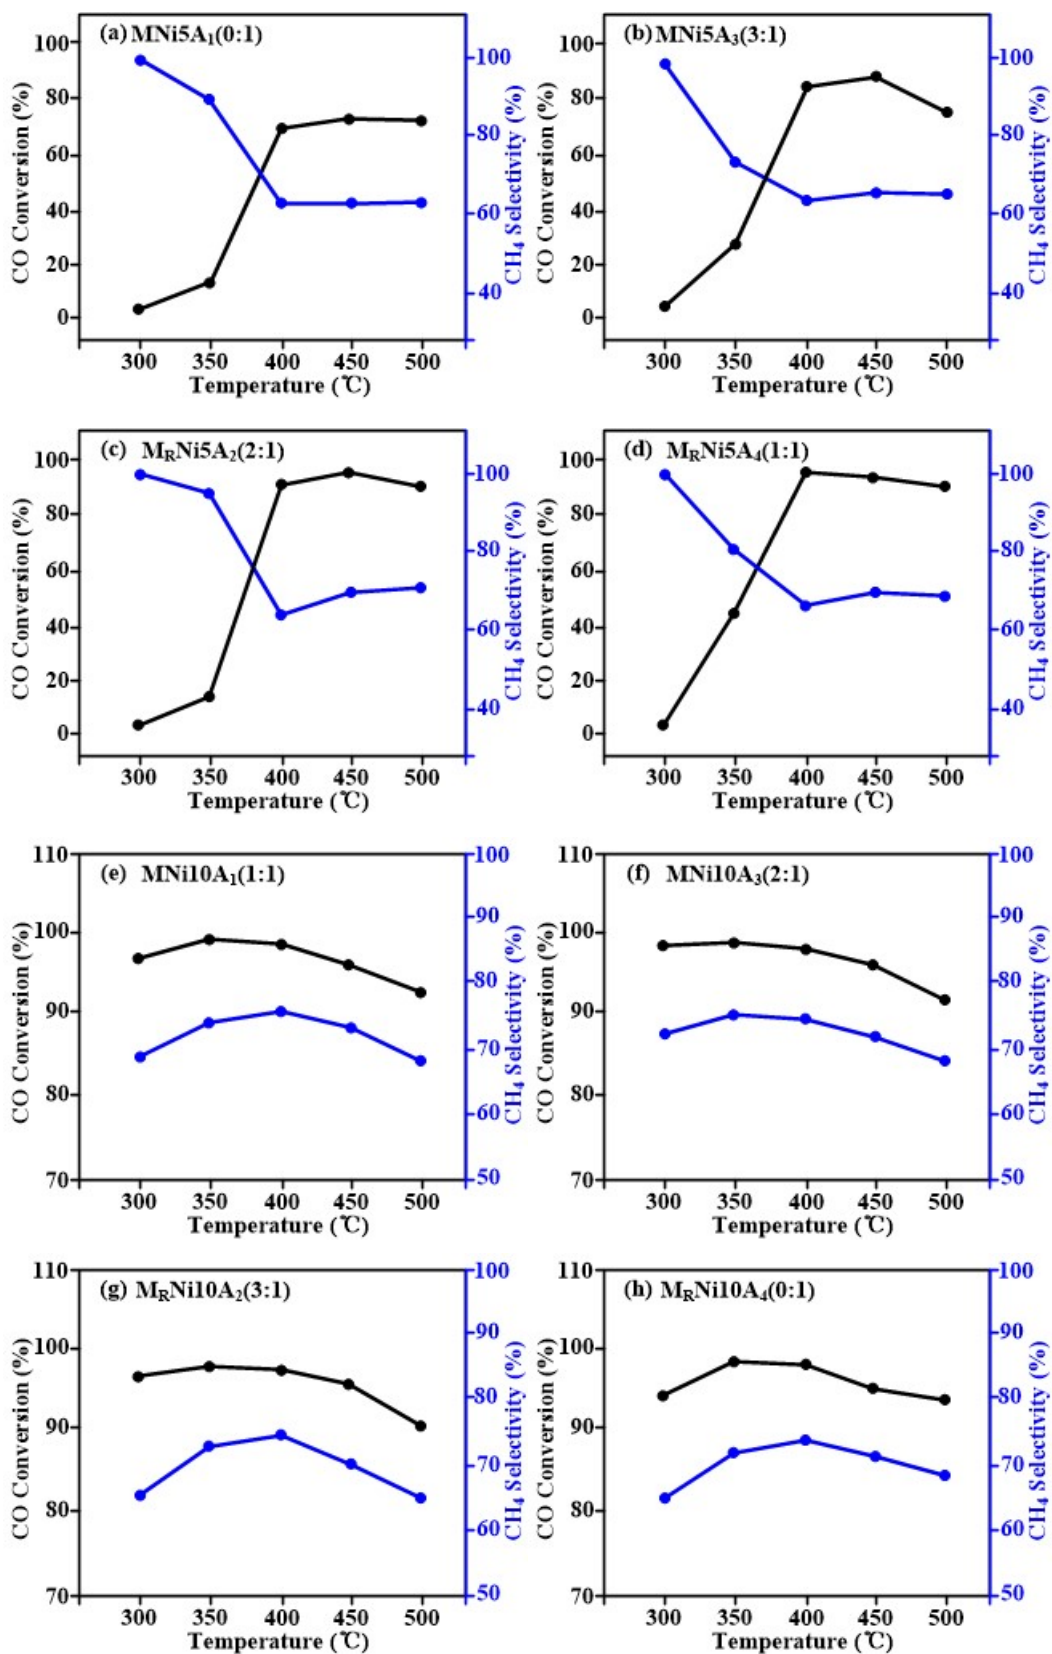

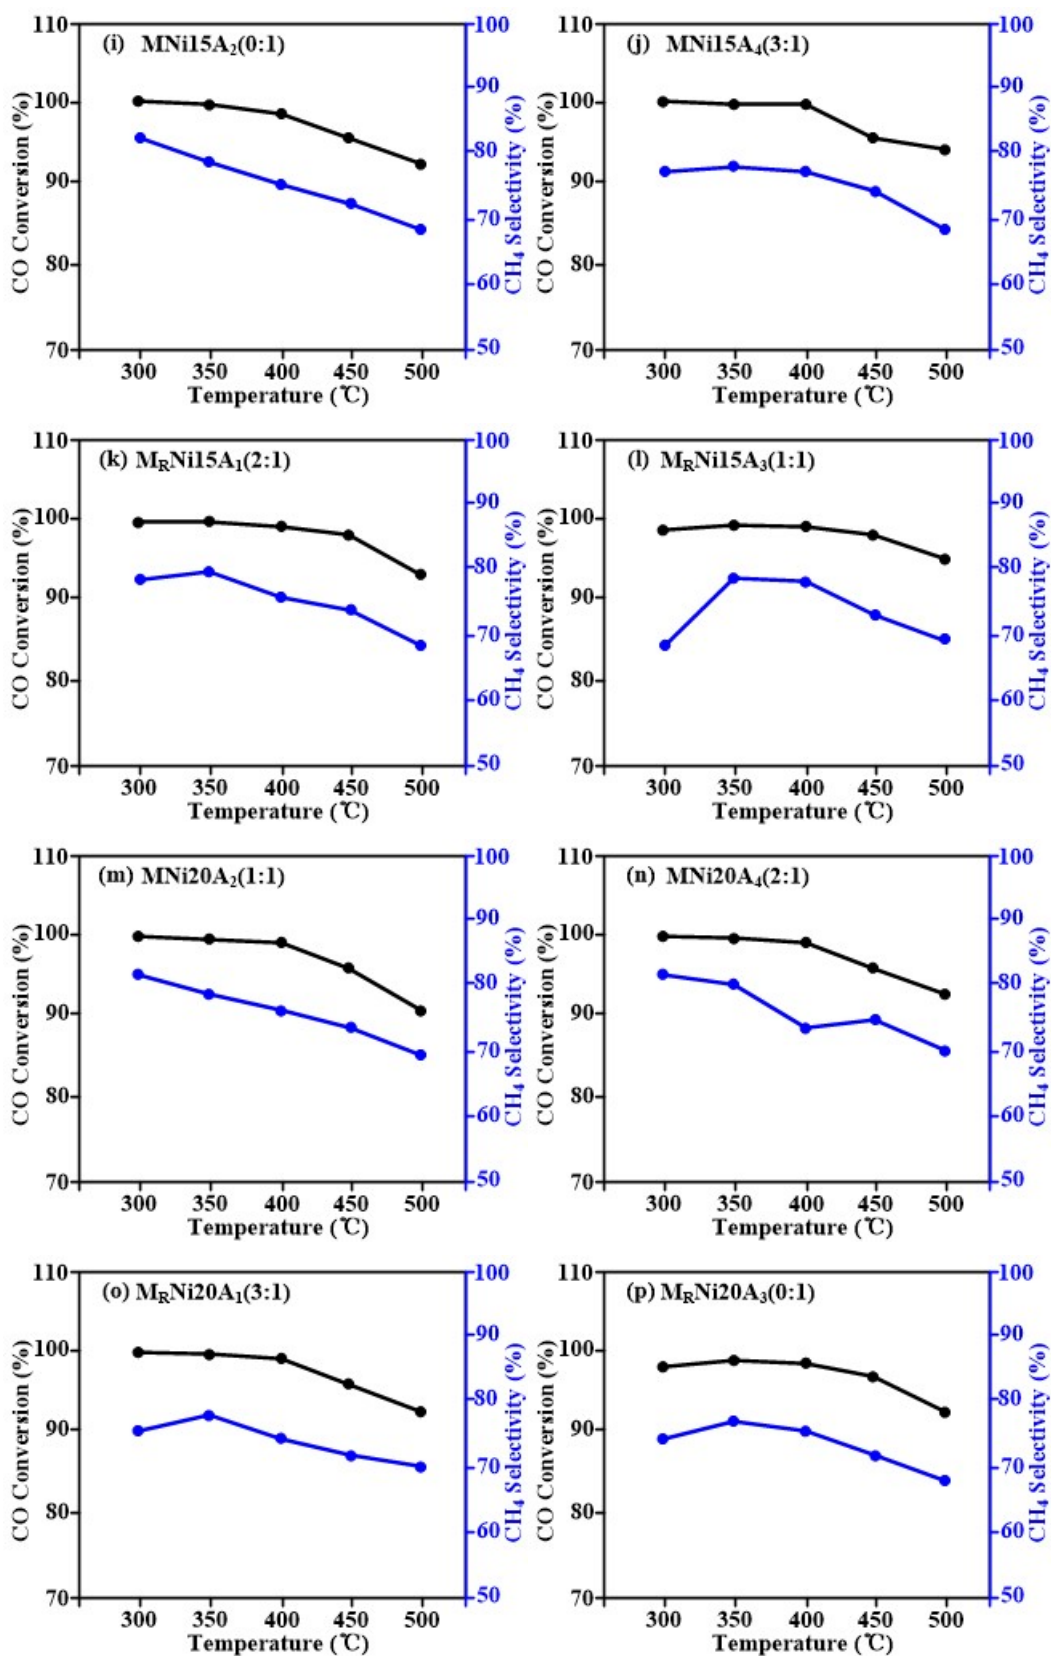

Fig. S5. CO Conversion and CH<sub>4</sub> selectivity of different catalysts for CO methanation.

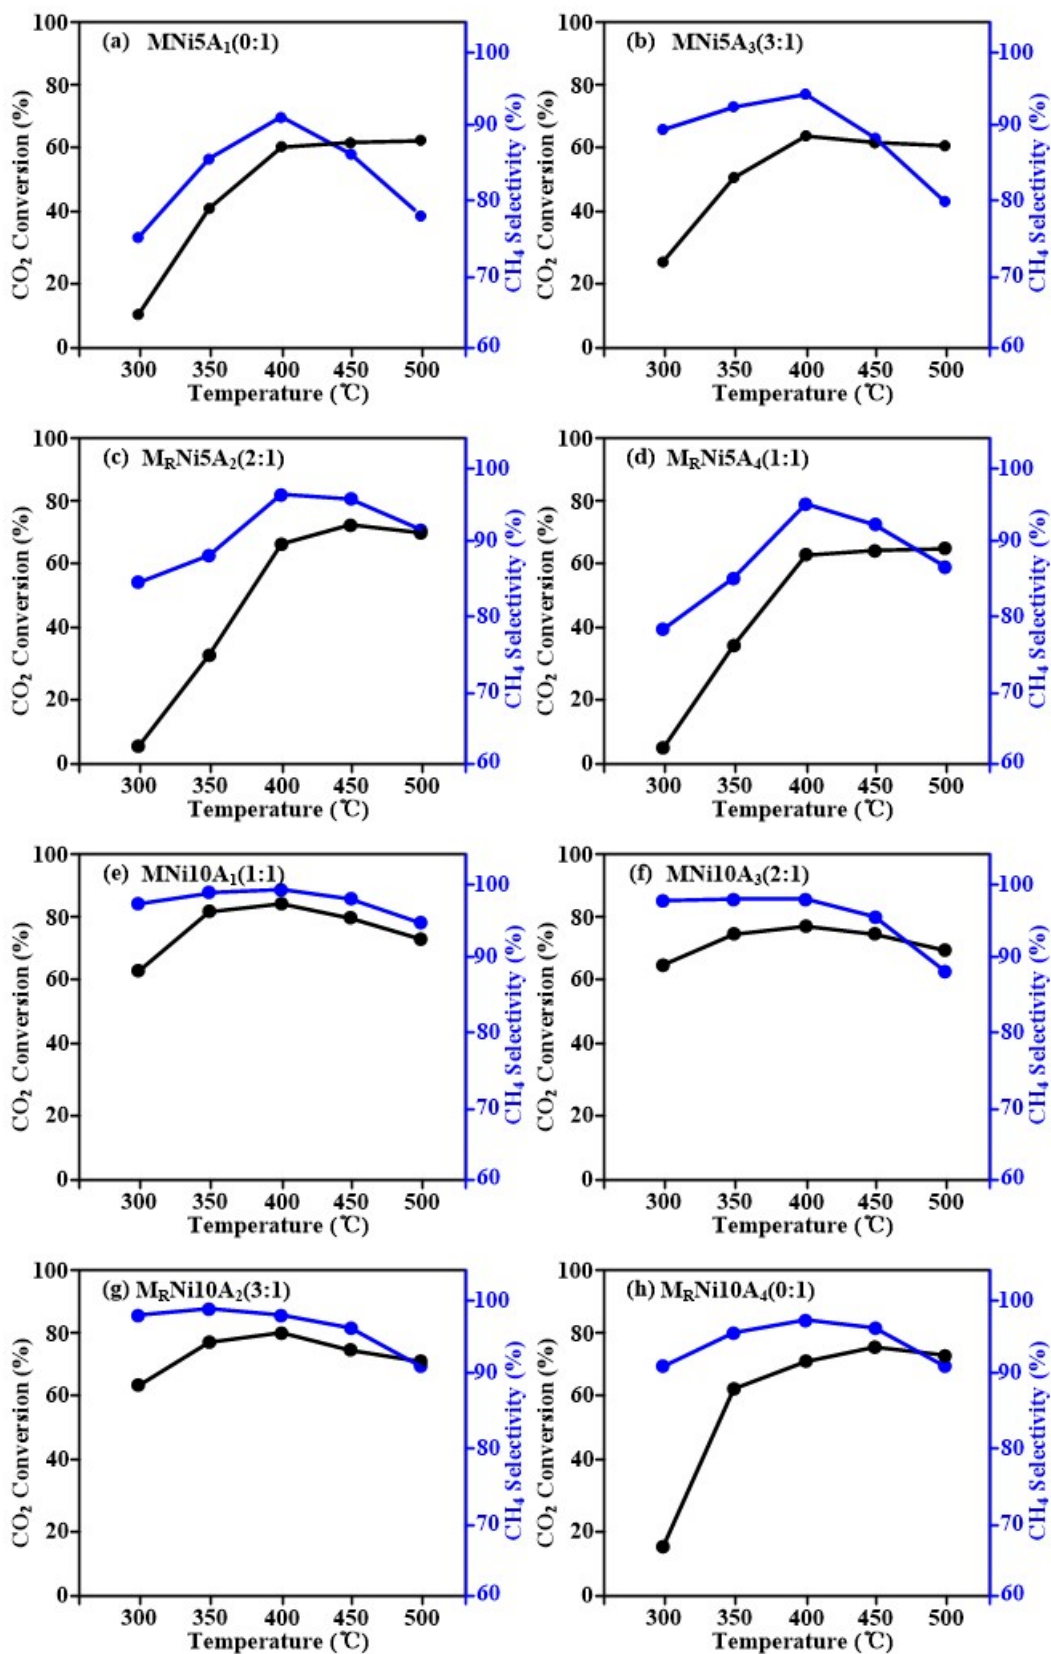

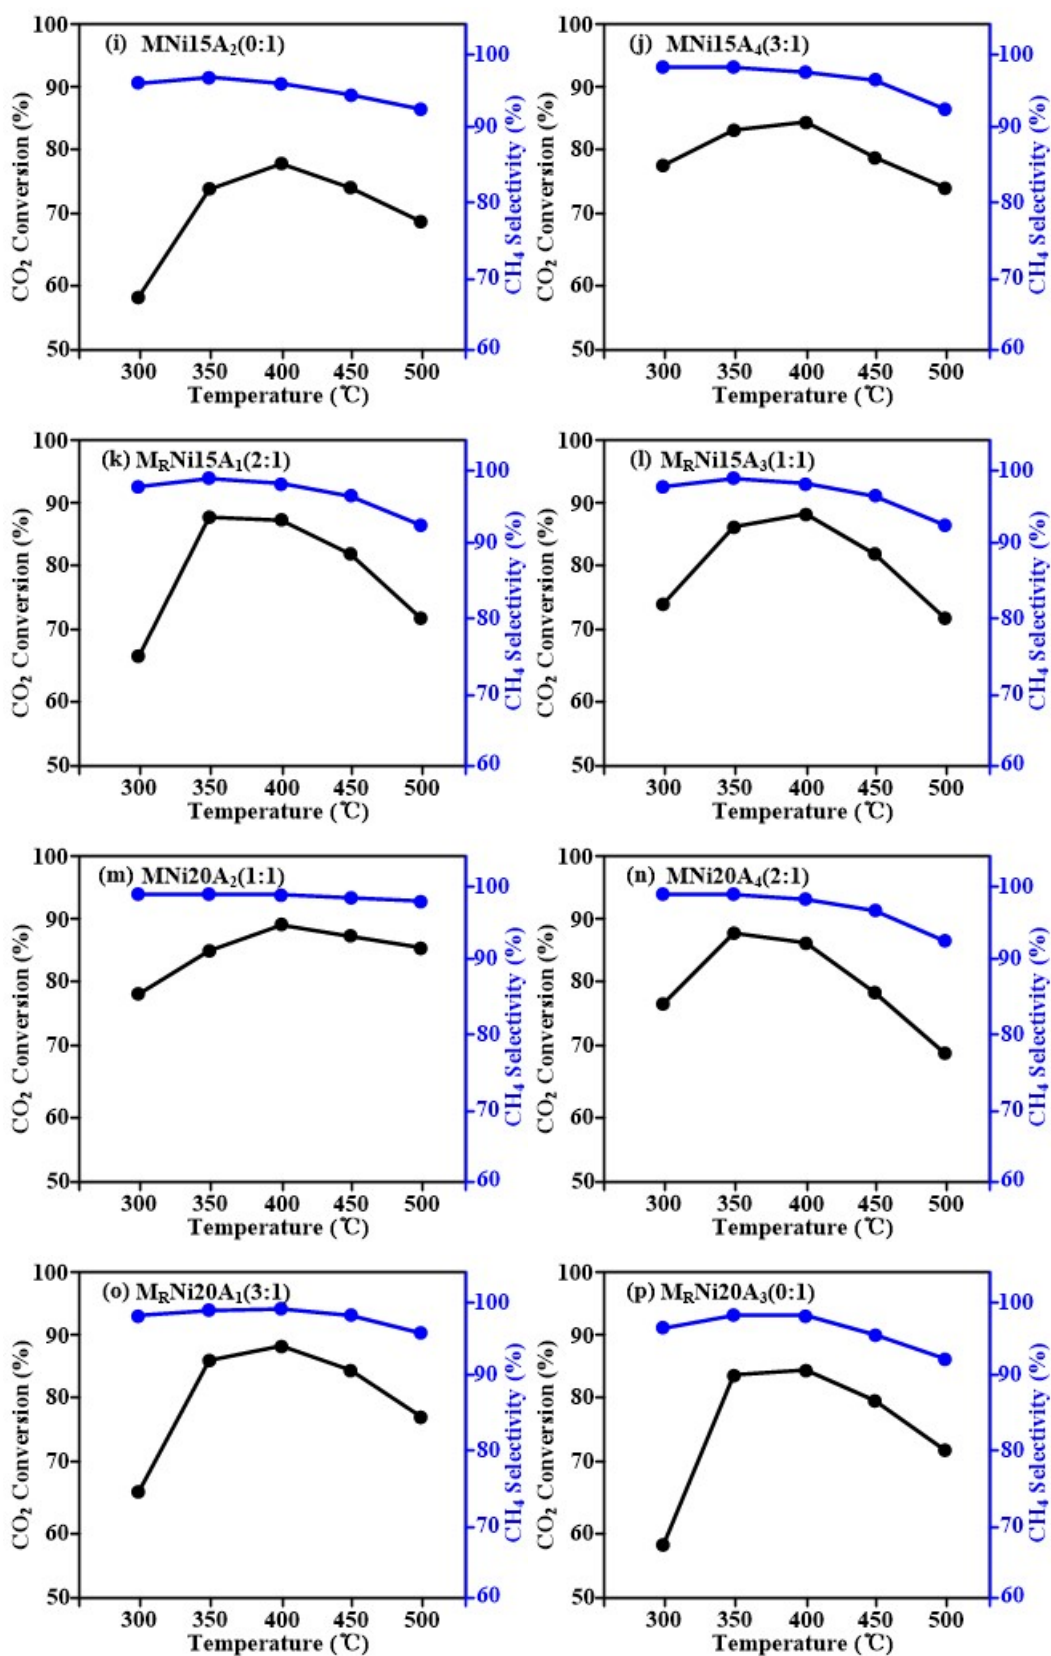

Fig. S6. CO<sub>2</sub> Conversion and CH<sub>4</sub> selectivity of different catalysts for CO<sub>2</sub> methanation.



### 3. Stability

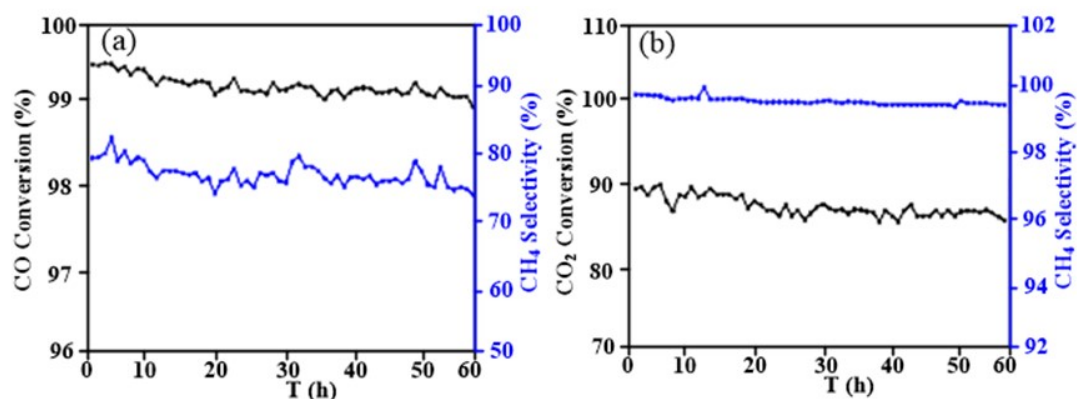

**Fig. S7.** Time on steam of the catalyst of MNi<sub>20</sub>A<sub>2</sub>(1:1) (a) CO methanation and (b) CO<sub>2</sub> methanation. GHSV= 12000 h<sup>-1</sup>, 0.1MPa and T= 400 °C for CO methanation; GHSV= 15000 h<sup>-1</sup>, 0.1 MPa and T= 400 °C for CO<sub>2</sub> methanation.

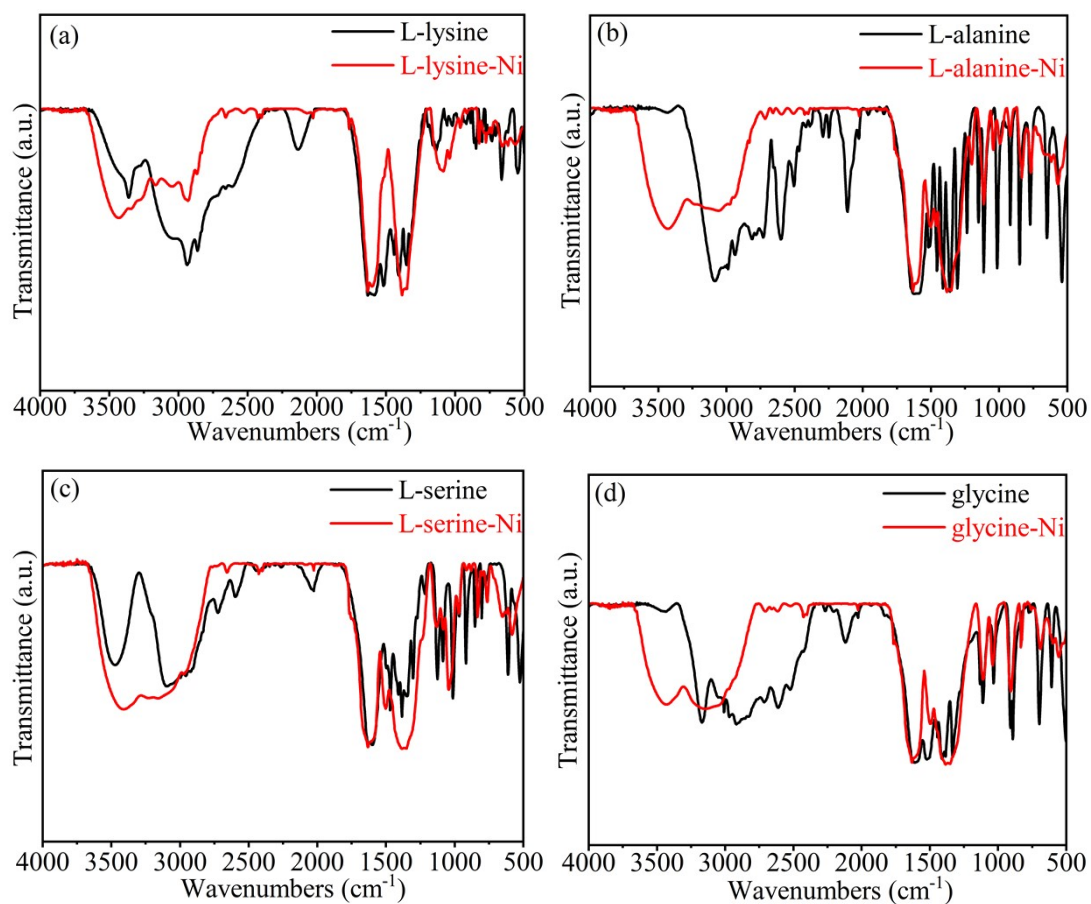

**Fig. S8.** FT-IR spectra of the samples (a) L-lysine, L-lysine-Ni, (b) L-alanine, L-alanine-Ni, (c) L-serine, L-serine-Ni, (d) glycine, glycine-Ni.
